# Supplementary material for: A Comparison of the Preservation of Mouse Adipose Tissue-Derived Mesenchymal Stem Cells Using the University of Wisconsin Solution and Hank’s Balanced Salt Solution
Source: Hindawi journal article supplement (doi:10.1155/2018/1625464), 2018-09-06

**A**

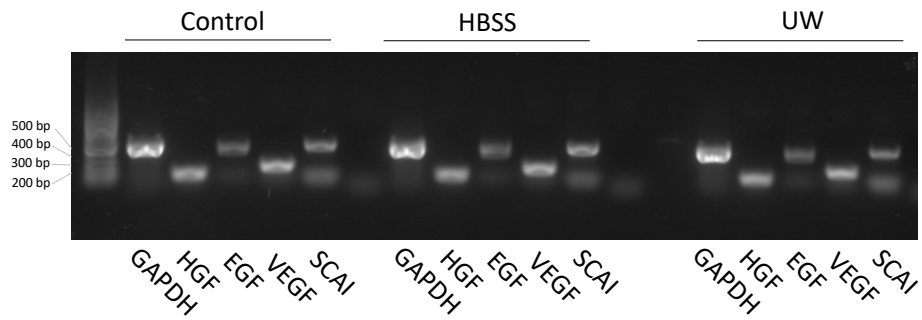

**B**

Full-length images of the blots used for Sup Fig. 1A

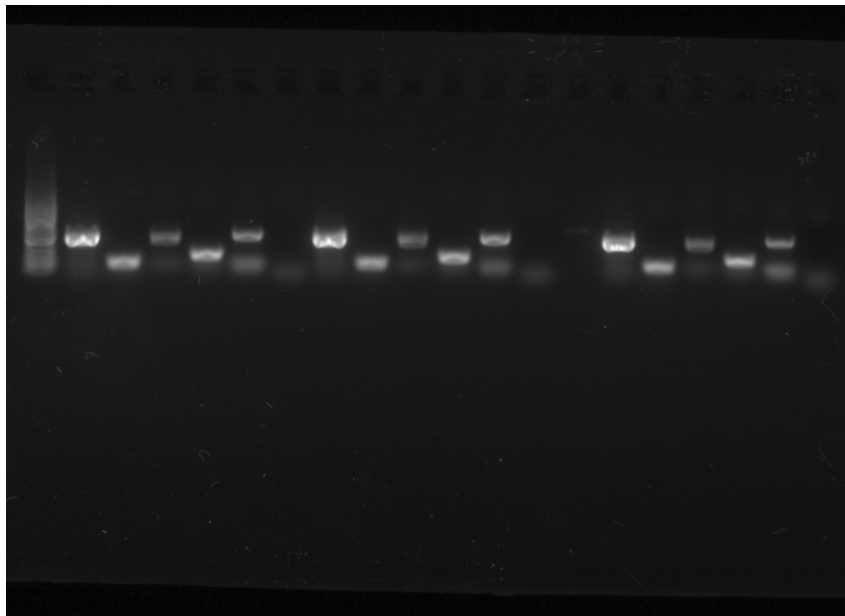

Supplement: f1 [file 1625464.f1.pdf]
